# Supplementary material for: MHY1485 enhances X-irradiation-induced apoptosis and senescence in tumor cells
Source: PubMed Central journal article supplement (PMC8438247; doi:10.1093/jrr/rrab057), 2021-07-16
Supplement: 2020mhy-spfig-sun4_rrab057.pdf [file 2020mhy-spfig-sun4_rrab057.pdf]

## Supplementary Data 1

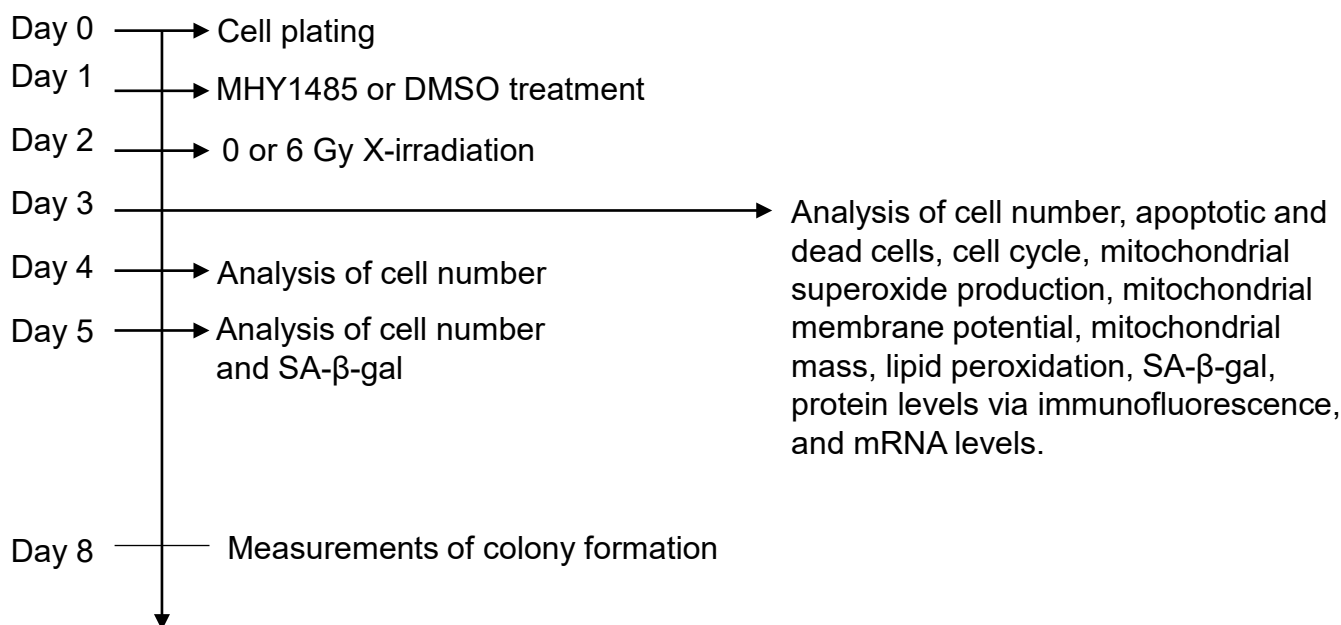

## Supplementary Data 2

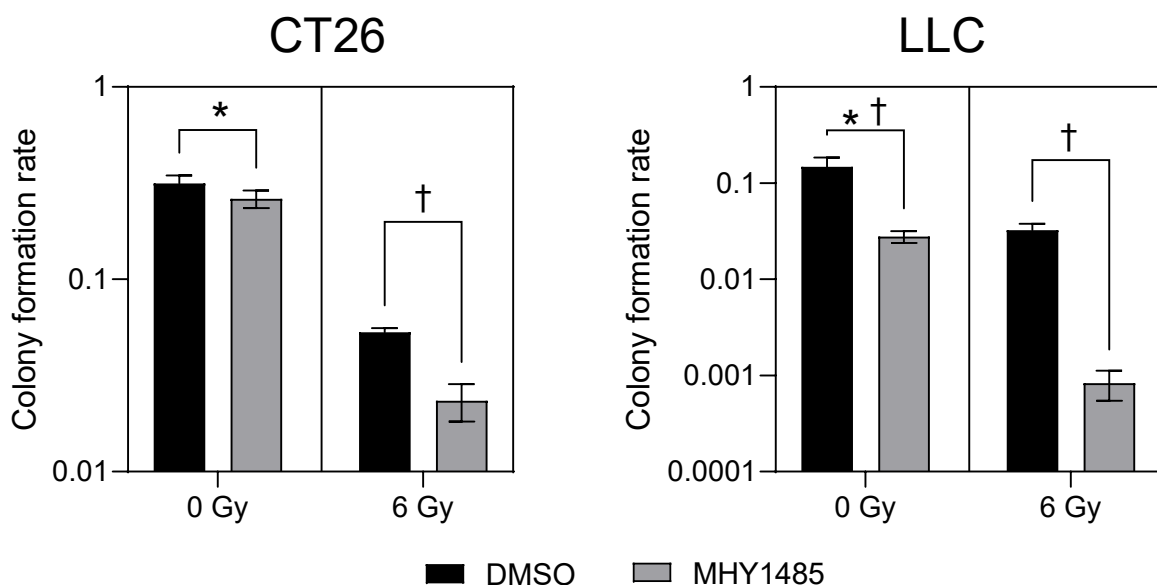

**Supplementary Data 2. Colony formation rate.** All quantitative data are presented as mean  $\pm$  SD (n = 3). \* p<0.05, two-way ANOVA with post hoc Sidak's multiple comparisons test vs. respective DMSO control. † p<0.05, two-tailed Student's t test vs. respective DMSO control.

## Supplementary Data 3

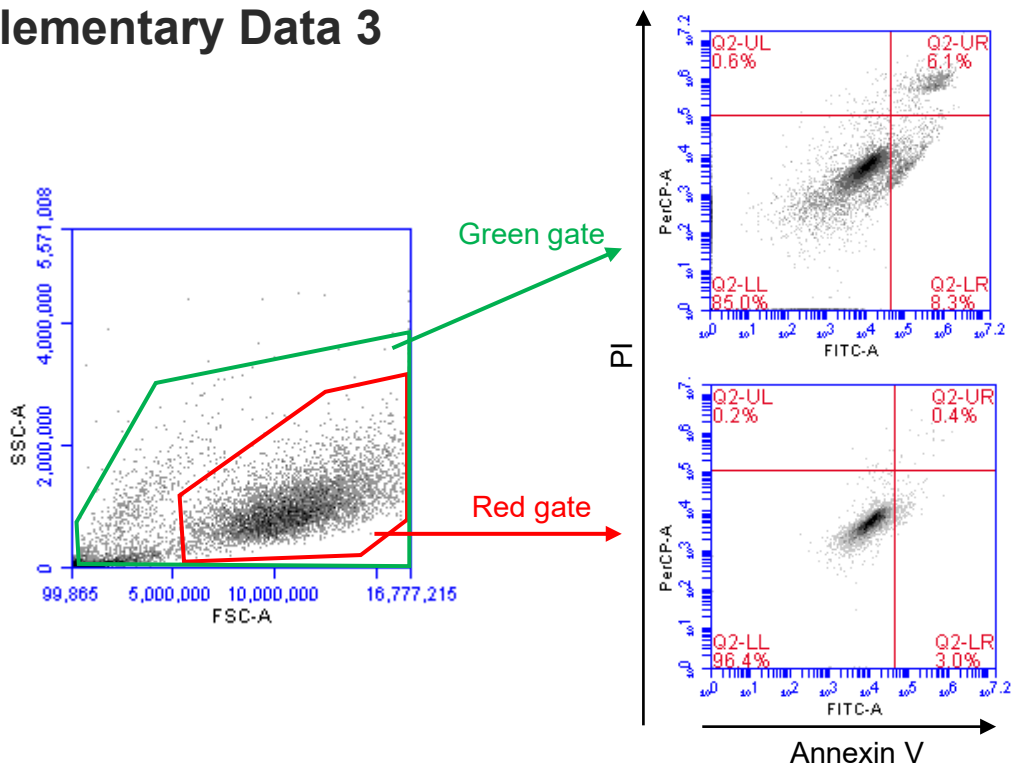

**Supplementary Data 3. Gating of FSC-SSC panel in live cell staining.** For apoptosis analysis (annexin V and JC-1), the green gate was set to include all cells. For senescence analysis (SPiDER- $\beta$ Gal, MitoBright, MitoSOX, and Liperfluo), the gate was used to excluding annexin V- and PI-positive cells.

## Supplementary Data 4

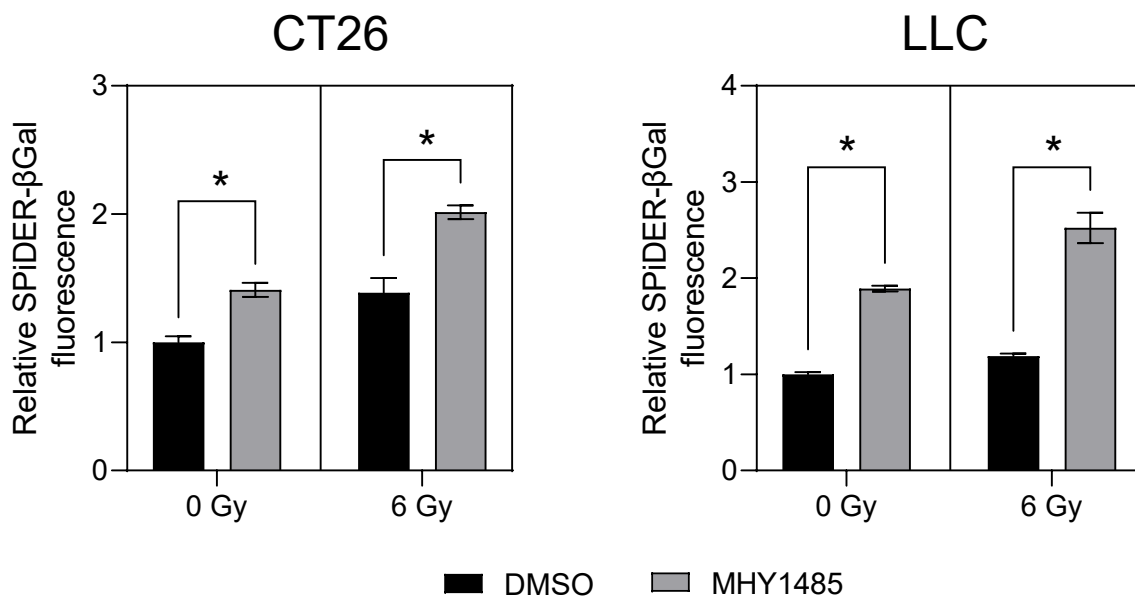

**Supplementary Data 4. Relative senescence-associated  $\beta$ -galactosidase levels on Day 5.** All quantitative data are presented as mean  $\pm$  SD (n = 3). \* p < 0.05, two-way ANOVA with post hoc Sidak's multiple comparisons test vs. respective DMSO control.

# Supplementary Data 5

## Representative profiles of flow cytometry

(Red line indicates peak in 0 Gy + DMSO groups.)

p-mTOR

p-4E-BP1

CT26

LLC

CT26

LLC

0 Gy  
+ DMSO

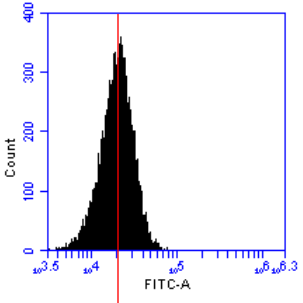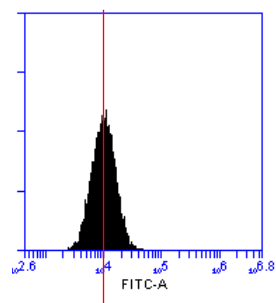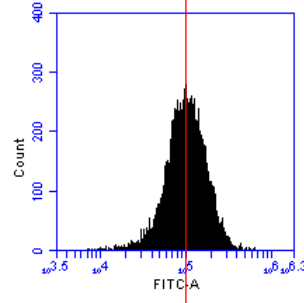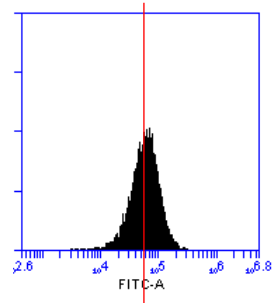

0 Gy  
+ MHY1485

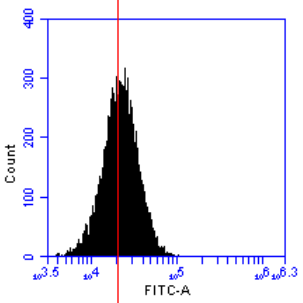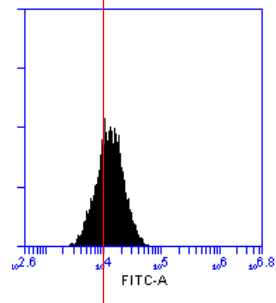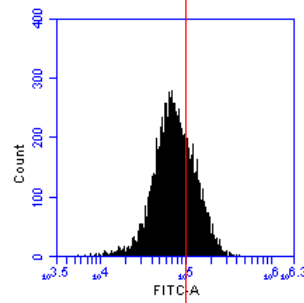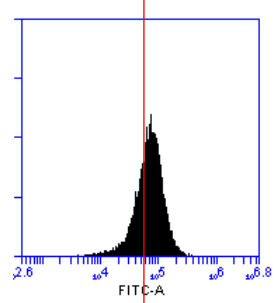

6 Gy  
+ DMSO

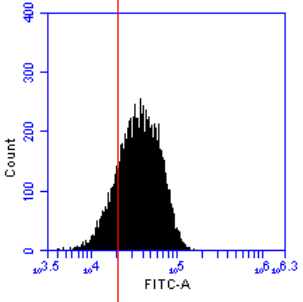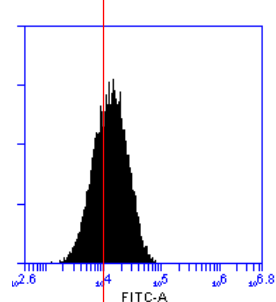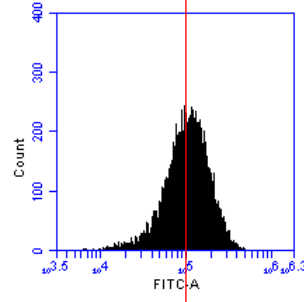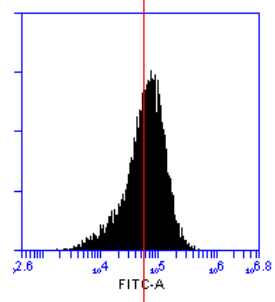

6 Gy  
+ MHY1485

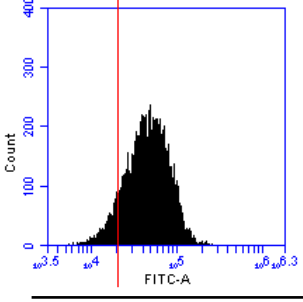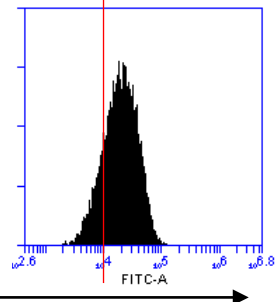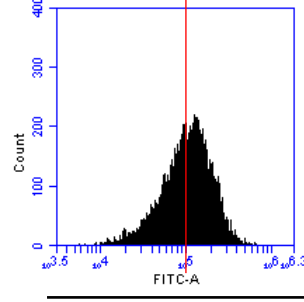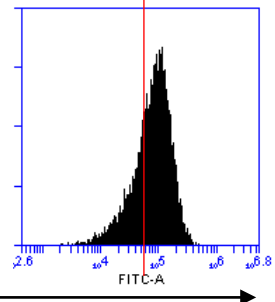

Fluorescence →

Fluorescence →

p-S6

p-Akt

CT26

LLC

CT26

LLC

0 Gy  
+ DMSO

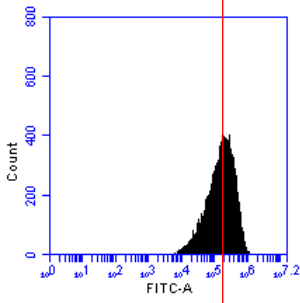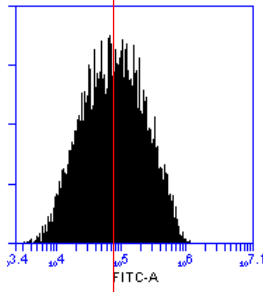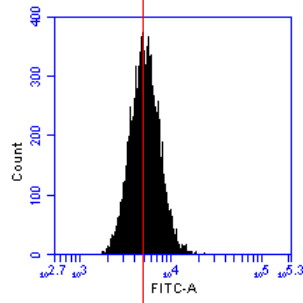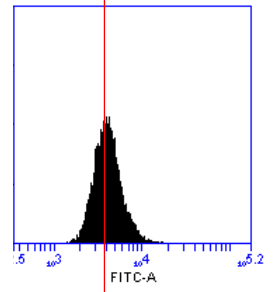

0 Gy  
+ MHY1485

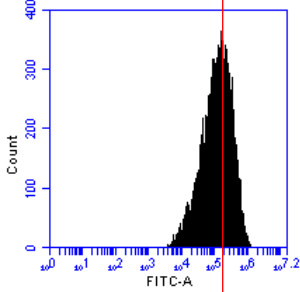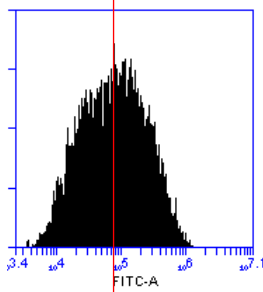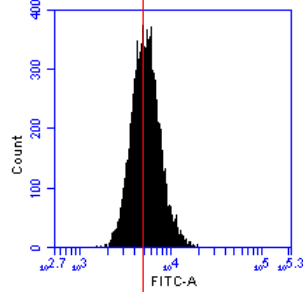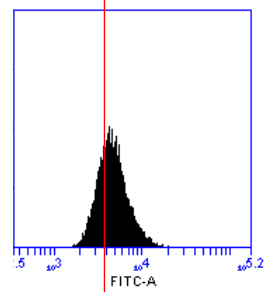

6 Gy  
+ DMSO

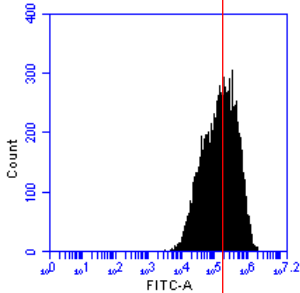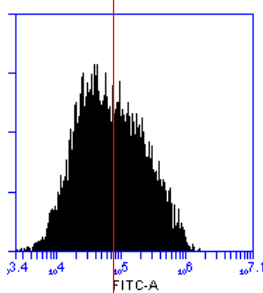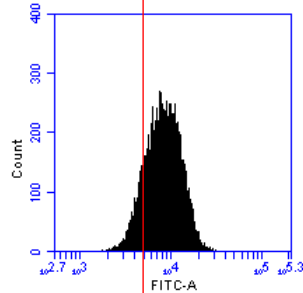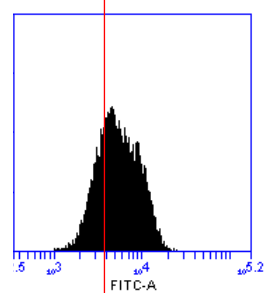

6 Gy  
+ MHY1485

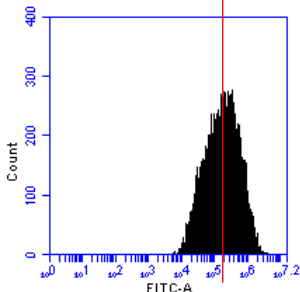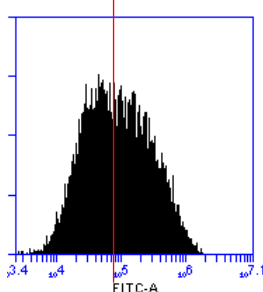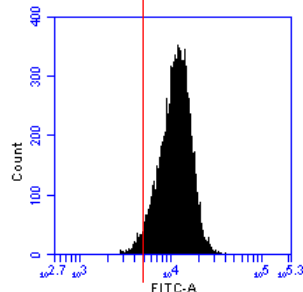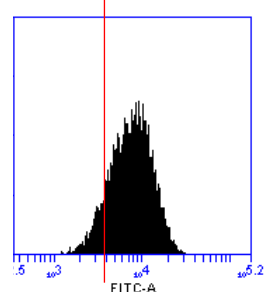

Fluorescence

Fluorescence

# Annexin V and PI staining

# JC-1 staining

CT26

LLC

CT26

LLC

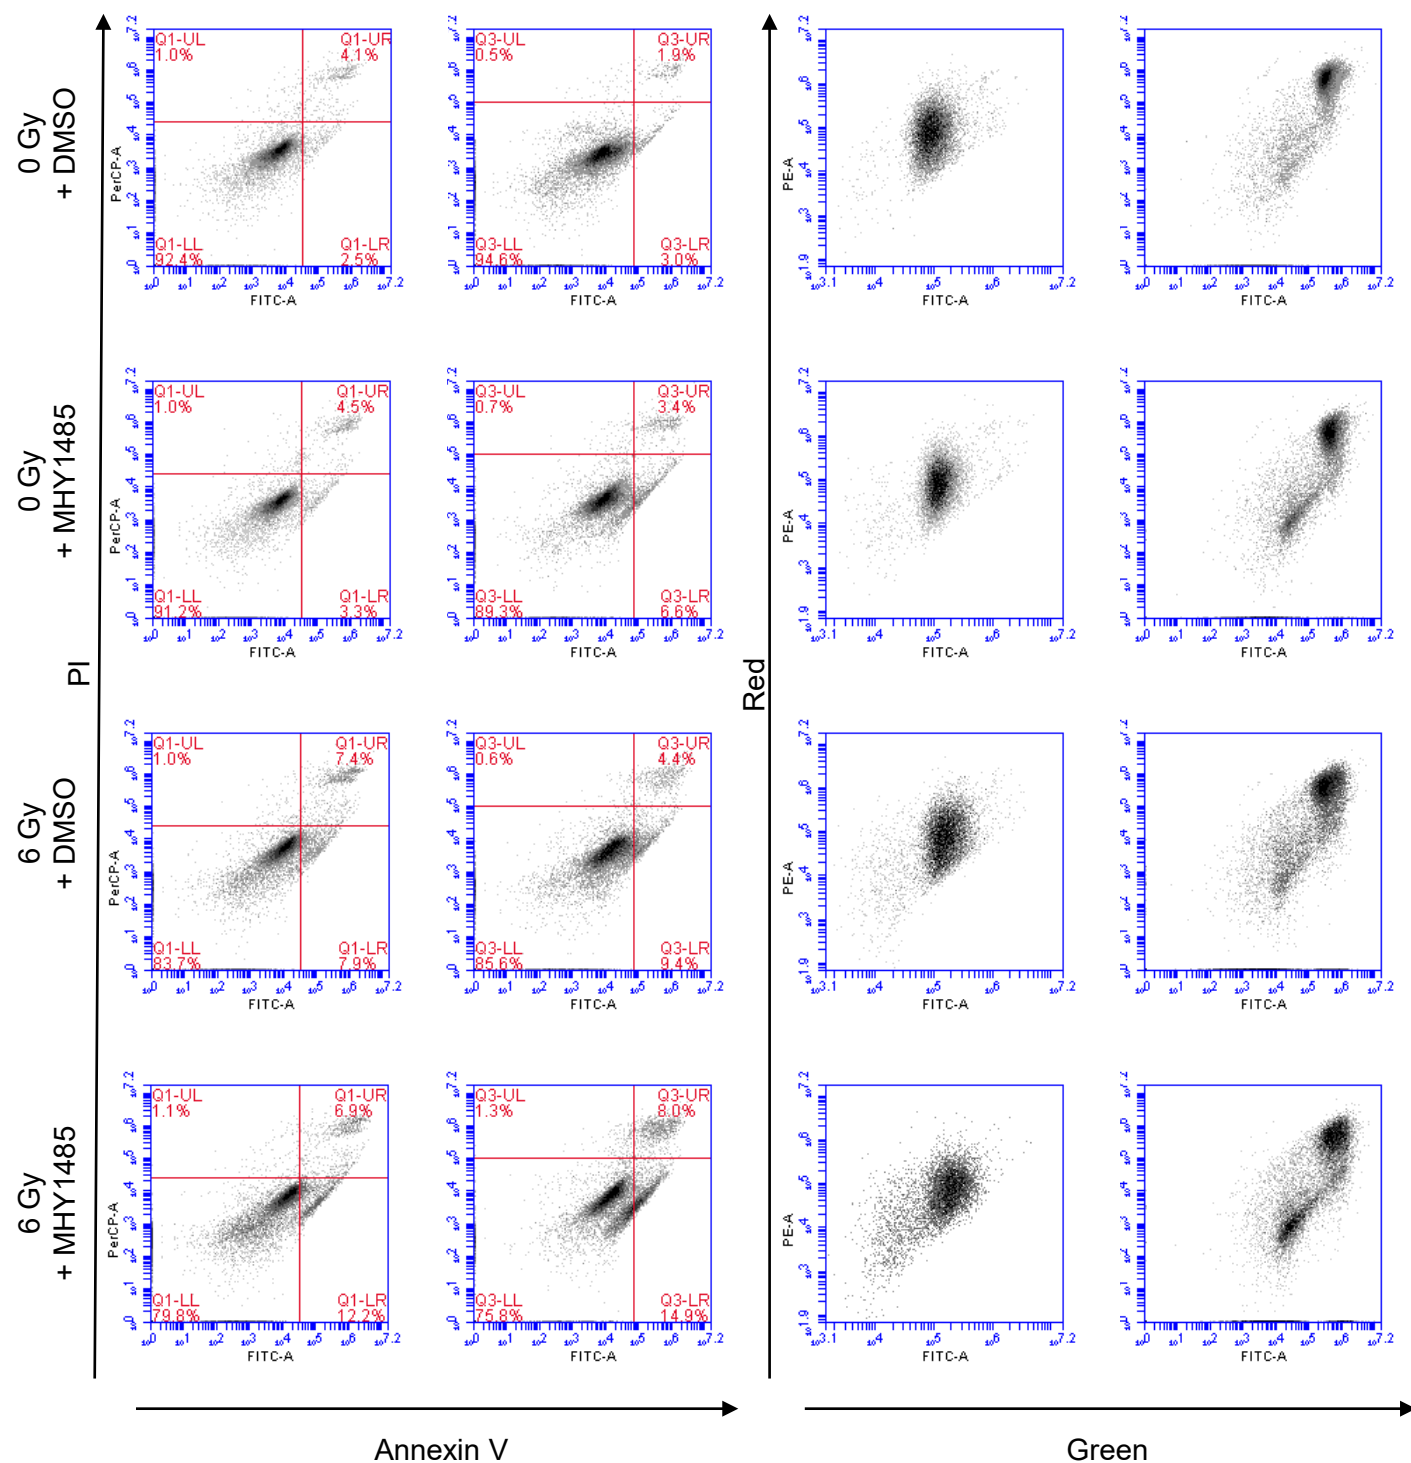

# Cell Cycle

## CT26

## LLC

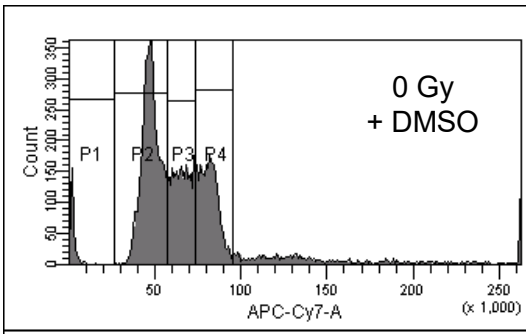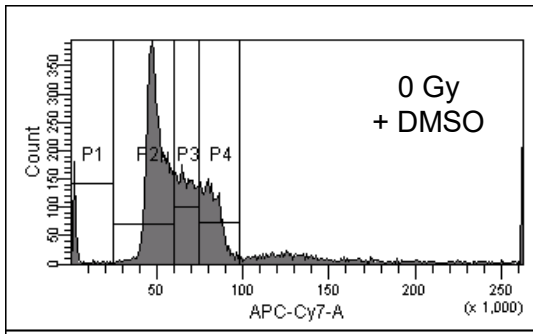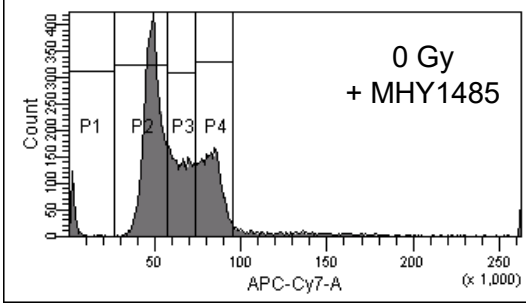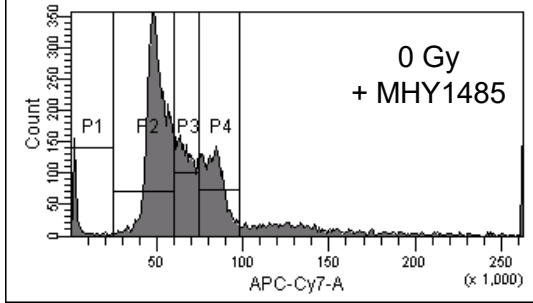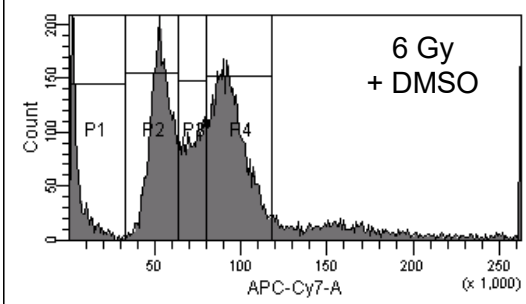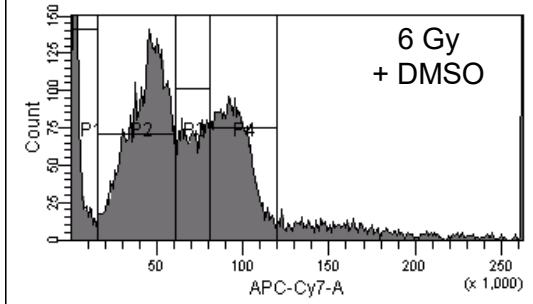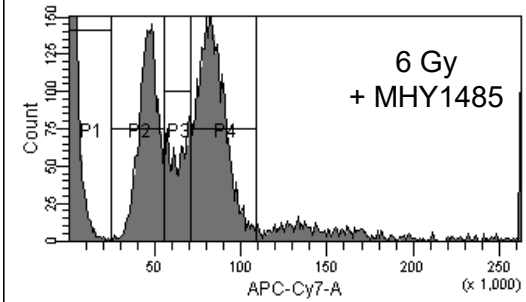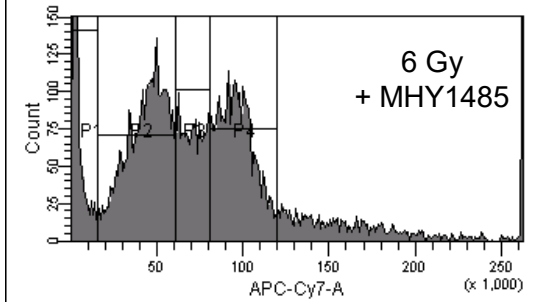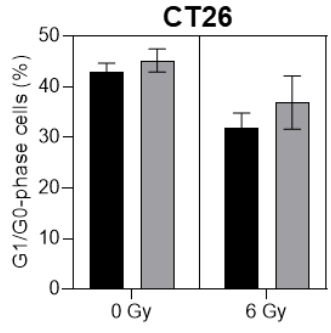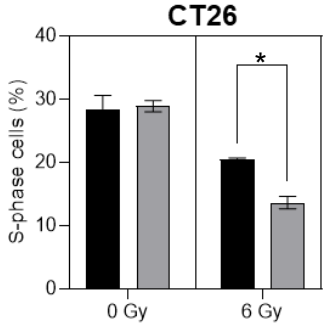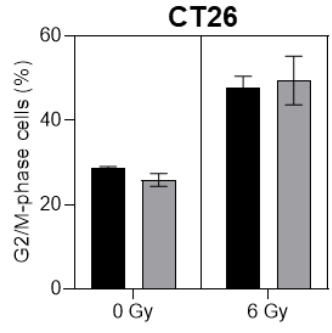

DMSO  
 MHY1485

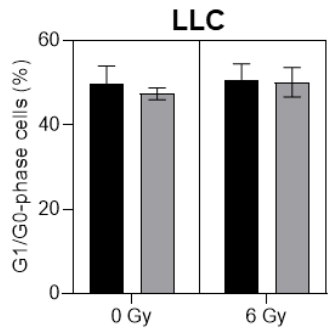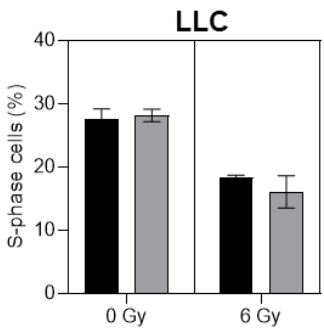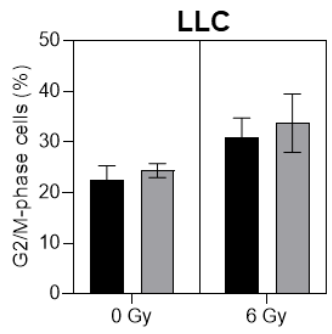

The quantitative data are presented as mean  $\pm$  SD (n = 3). \* p<0.05, two-way ANOVA with post hoc Sidak's multiple comparisons test vs. respective DMSO control.

SA- $\beta$ -gal  
(24h after irradiation)

SA- $\beta$ -gal  
(72h after irradiation)

CT26

LLC

CT26

LLC

0 Gy  
+ DMSO

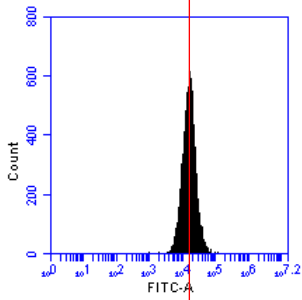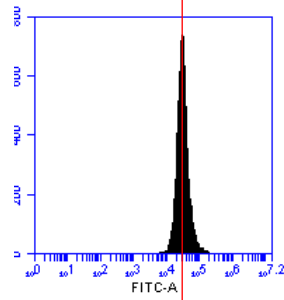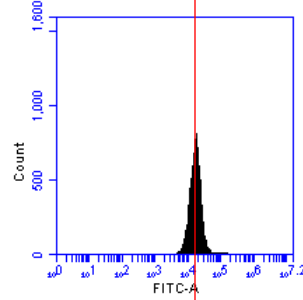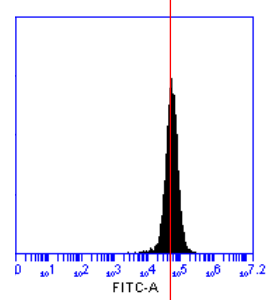

0 Gy  
+ MHY1485

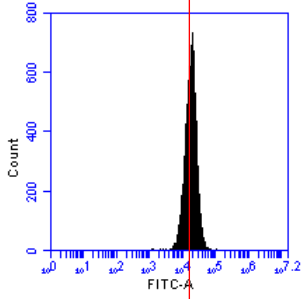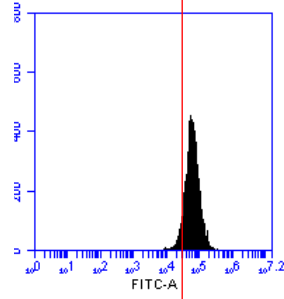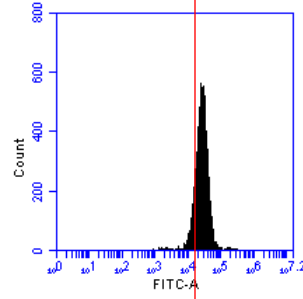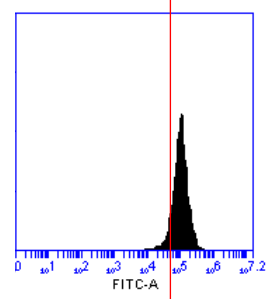

6 Gy  
+ DMSO

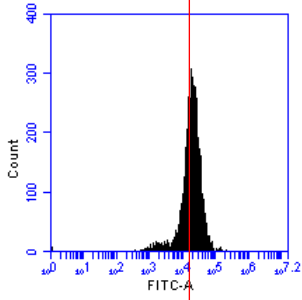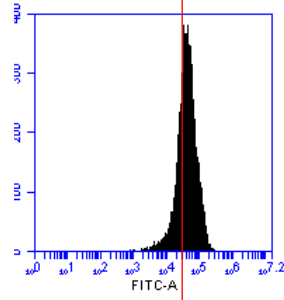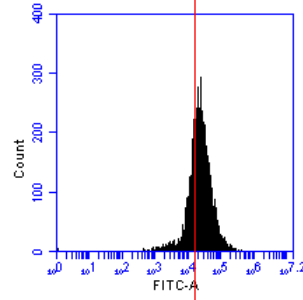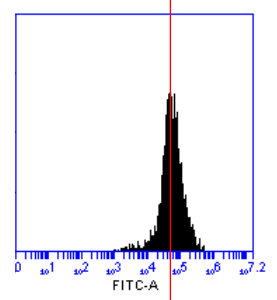

6 Gy  
+ MHY1485

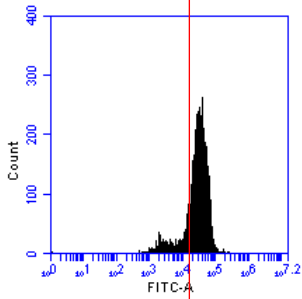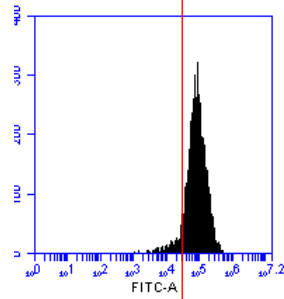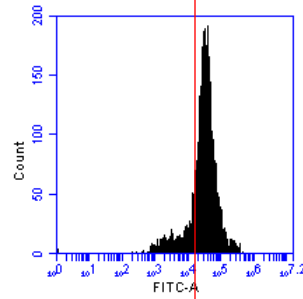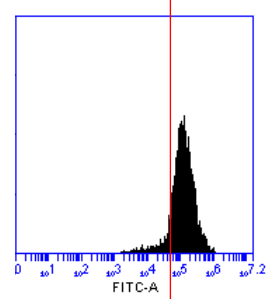

SPiDER- $\beta$ Gal

SPiDER- $\beta$ Gal

# Mitochondria volume

# Mitochondria superoxide

## CT26

## LLC

## CT26

## LLC

0 Gy  
+ DMSO

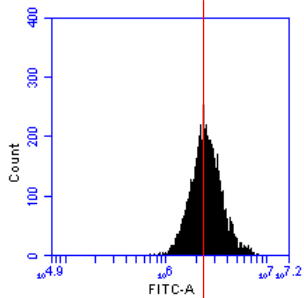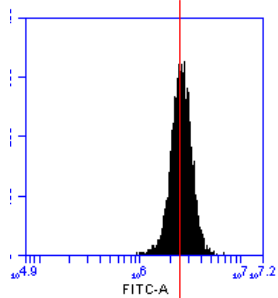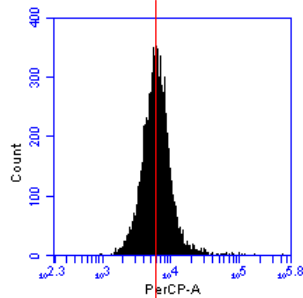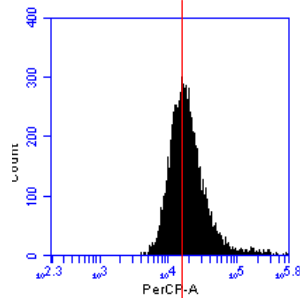

0 Gy  
+ MHY1485

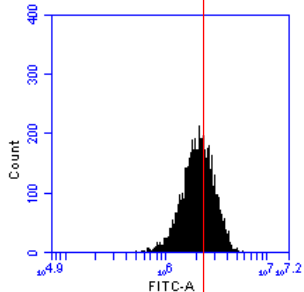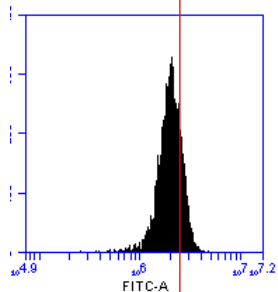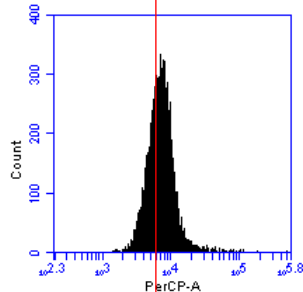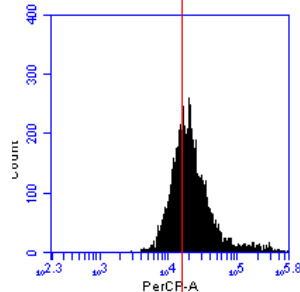

6 Gy  
+ DMSO

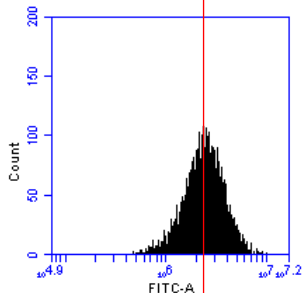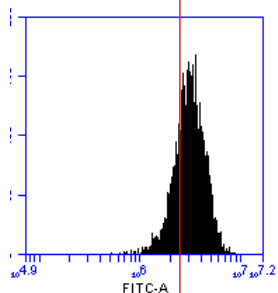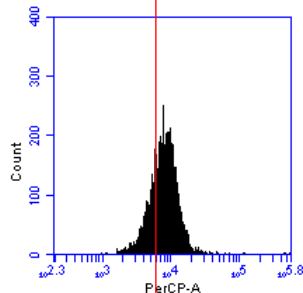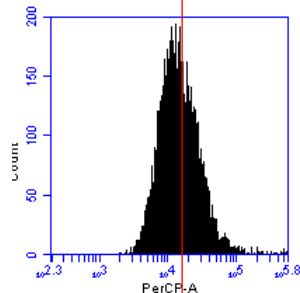

6 Gy  
+ MHY1485

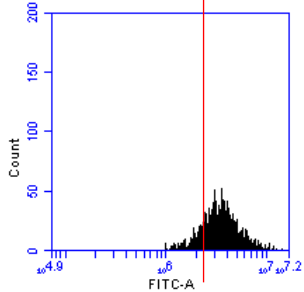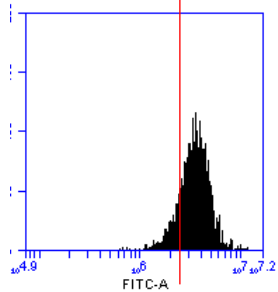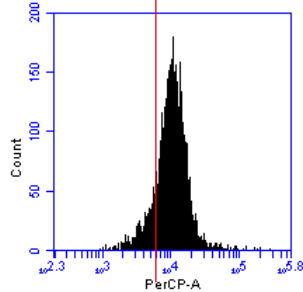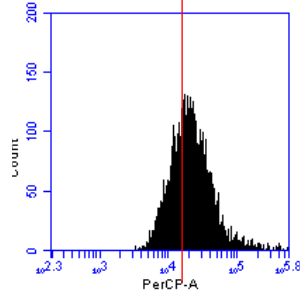

MitoBright

MitoSOX



Lipid peroxide

p21

CT26

LLC

CT26

LLC

0 Gy  
+ DMSO

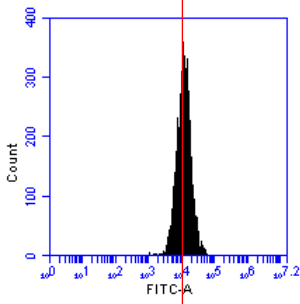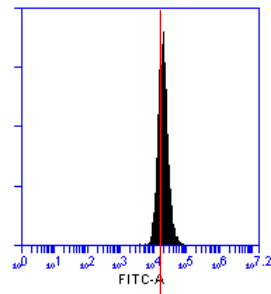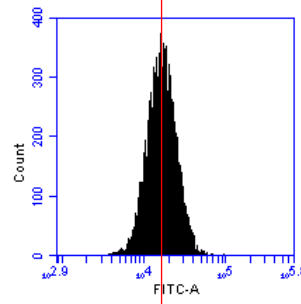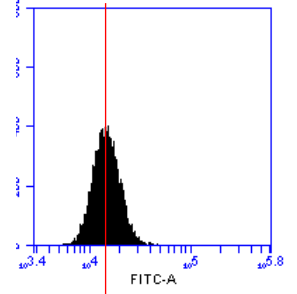

0 Gy  
+ MHY1485

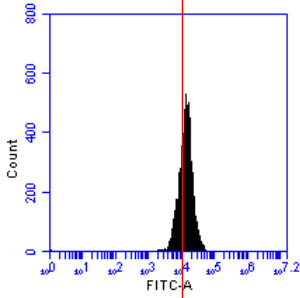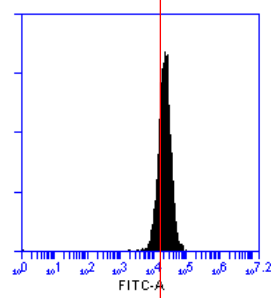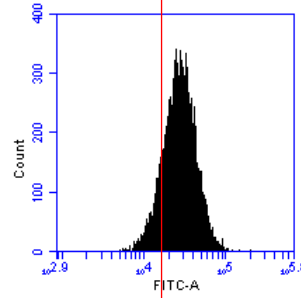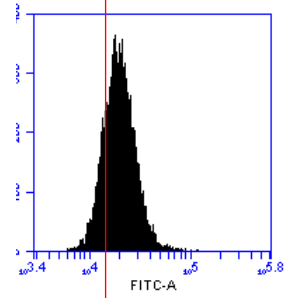

6 Gy  
+ DMSO

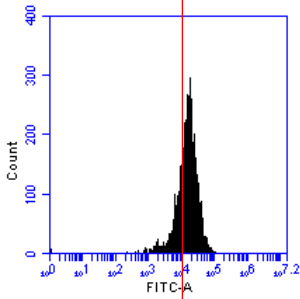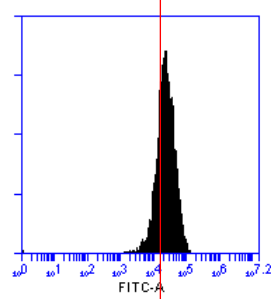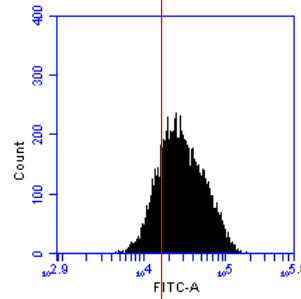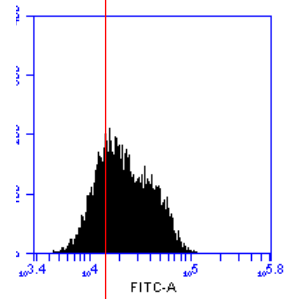

6 Gy  
+ MHY1485

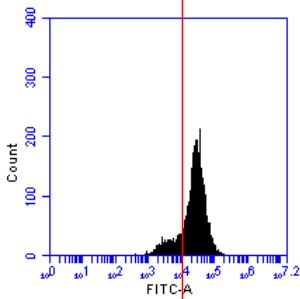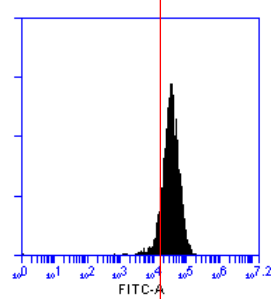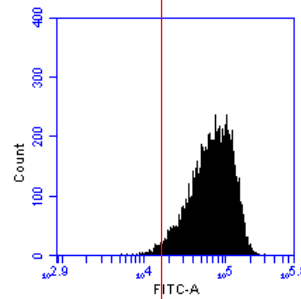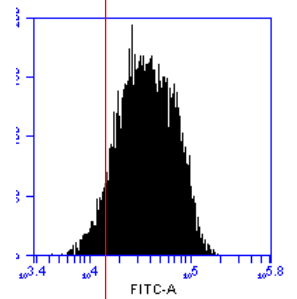

Liperfluor

Fluorescence

# CHOP

# BiP

## CT26

## LLC

## CT26

## LLC

0 Gy  
+ DMSO

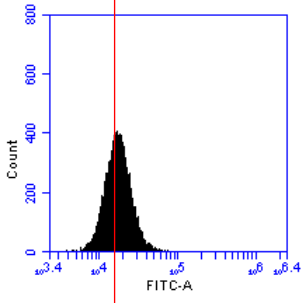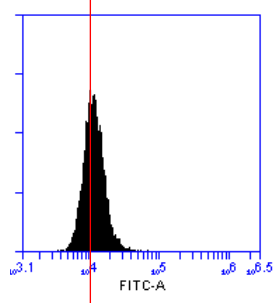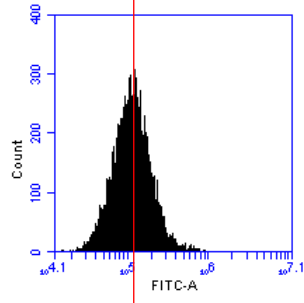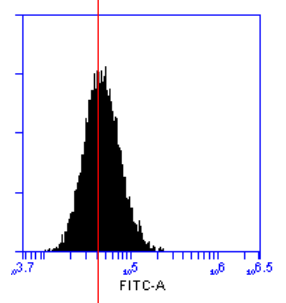

0 Gy  
+ MHY1485

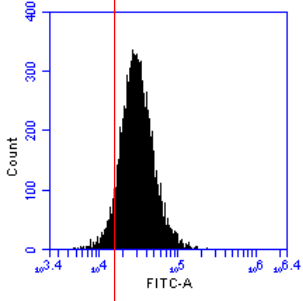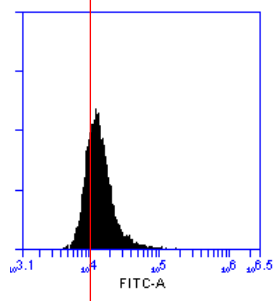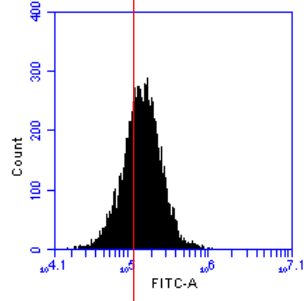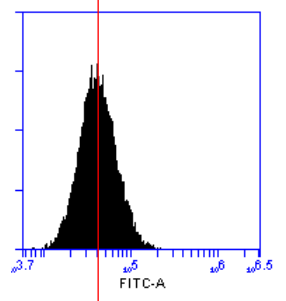

6 Gy  
+ DMSO

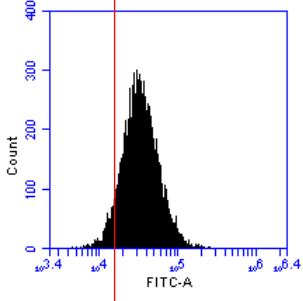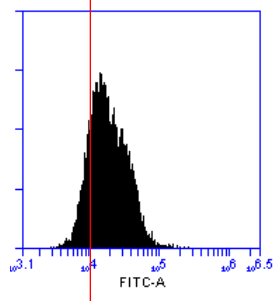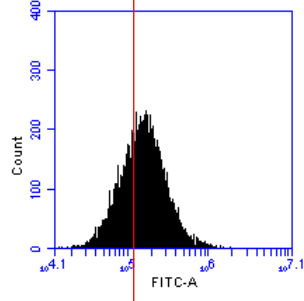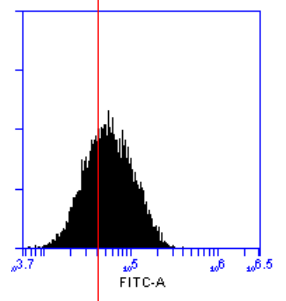

6 Gy  
+ MHY1485

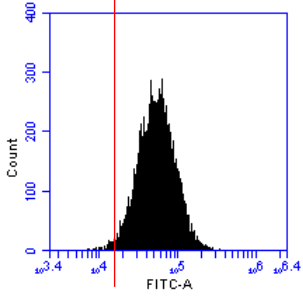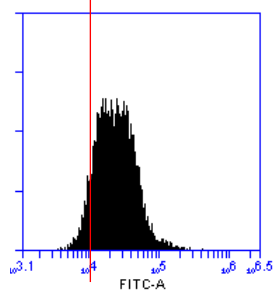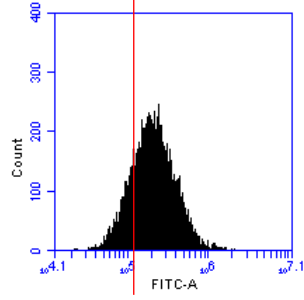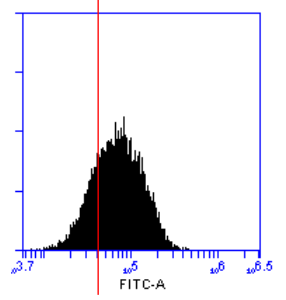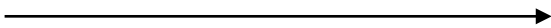

Fluorescence

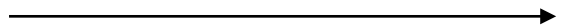

Fluorescence

# p-JNK

## CT26

## LLC

0 Gy  
+ DMSO

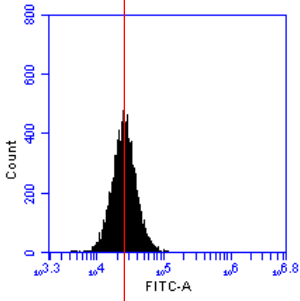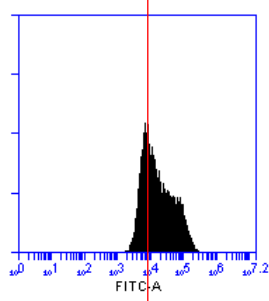

0 Gy  
+ MHY1485

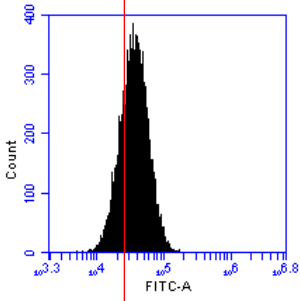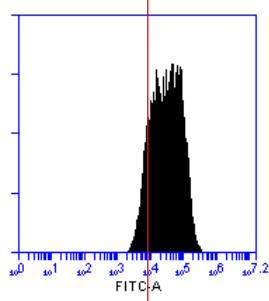

6 Gy  
+ DMSO

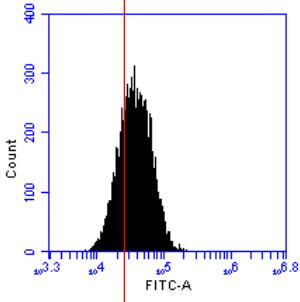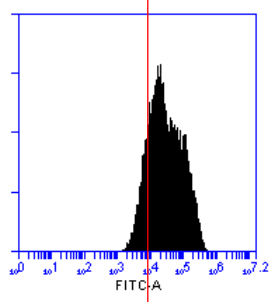

6 Gy  
+ MHY1485

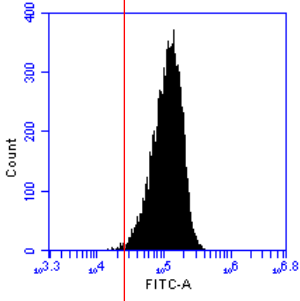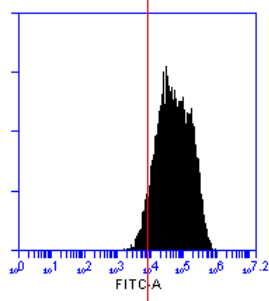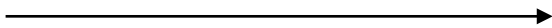

Fluorescence
